# Supplementary material for: Simple one-pot fabrication of ultra-stable core-shell superparamagnetic nanoparticles for potential application in drug delivery
Source: Royal Society of Chemistry journal article supplement (doi:10.1039/c2ra20199b), 2012-01-01
Supplement: c2ra20199b.pdf [file c2ra20199b.pdf]

## Electronic Supplementary Information (ESI)

### **Simple one-pot fabrication of ultra-stable core-shell superparamagnetic nanoparticles for potential application in drug delivery**

Tapas Sen<sup>a,b\*</sup>, Sarah J. Sheppard<sup>a,c</sup>, Tim Mercer<sup>d</sup>, Maneea Eizadi-sharifabad<sup>a</sup>, Morteza Mahmoudi<sup>e,f</sup> and Abdelbary Elhissi<sup>c</sup>

<sup>a</sup>Centre for Materials Science, School of Forensic and Investigative Sciences

<sup>b</sup>Institute of Nanotechnology and Bioengineering

<sup>c</sup>School of Pharmacy and Biomedical Sciences

<sup>d</sup>School of Computing Engineering and Physical Sciences

<sup>e</sup>Nanotechnology Research Center, Faculty of Pharmacy, Tehran University of Medical Sciences, Tehran, Iran

<sup>f</sup>NanoBio Interactions Laboratory, National Cell Bank, Pasteur Institute of Iran, Tehran, Iran

University of Central Lancashire

Preston, PR1 2HE

United Kingdom

\*Corresponding author

Email: tsen@uclan.ac.uk

Telephone: +44 1772 89 4371

Fax: +44 1772 89 4981.

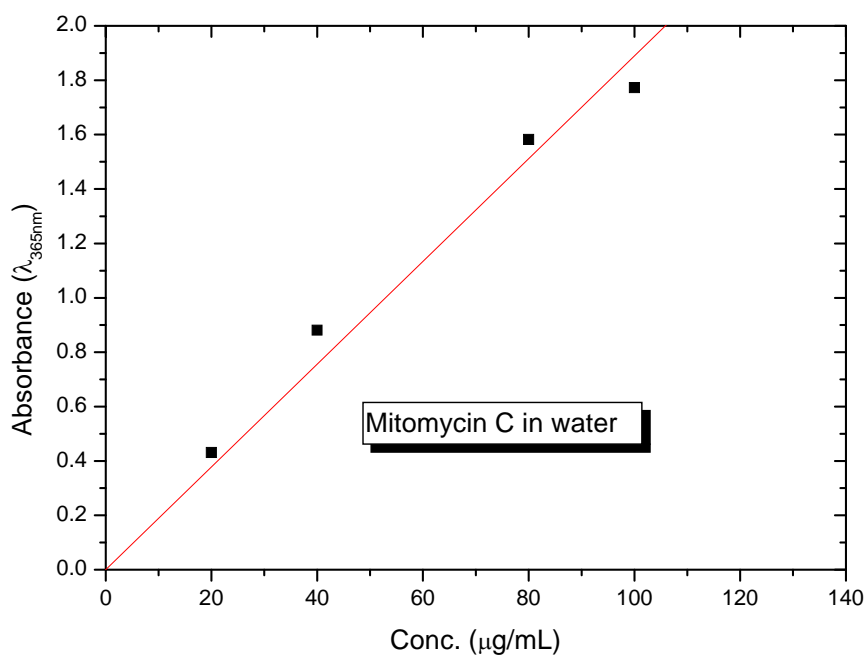

**Figure S1.** Standard curve of Mitomycin C in water

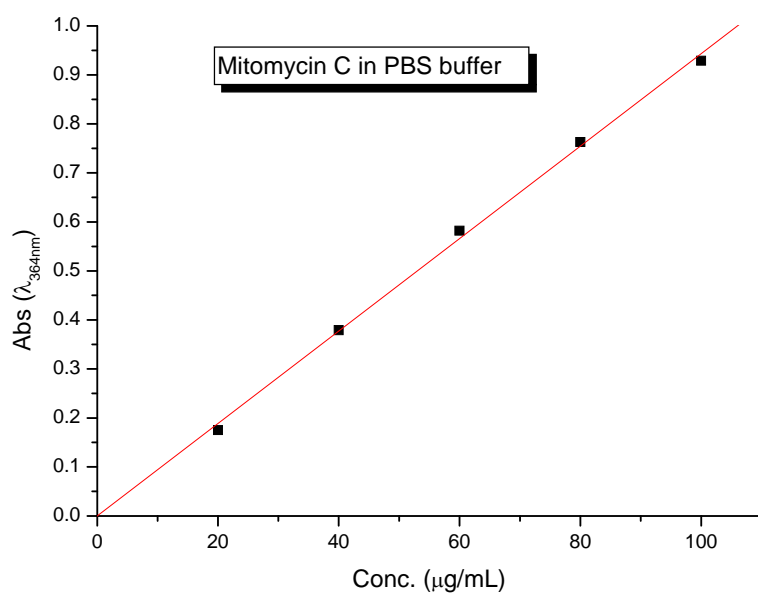

**Figure S2.** Standard curve of Mitomycin C in PBS buffer

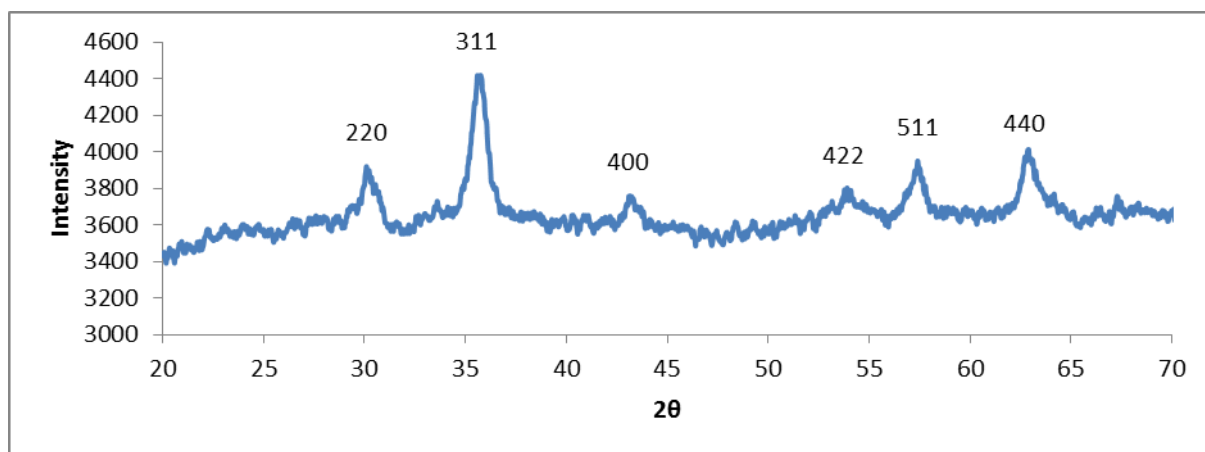

**Figure S3.** XRD pattern of SPIONs core

**Table S1.** Loading data of Mitomycin C in water (pH = 6.8) at 25<sup>0</sup>C

| Materials | Time (hr) | MMC Conc. (µg/mL) | Conc. of nanomaterials (mg/mL) | MMC remaining in the solution (µg/mL) | Fraction of MMC remaining in the solution | MMC extracted from solution (µg) | % MMC extracted from solution | MMC loaded (µg MMC/mg of materials) |
|-----------|-----------|-------------------|--------------------------------|---------------------------------------|-------------------------------------------|----------------------------------|-------------------------------|-------------------------------------|
| SS068     | 0.5       | 71                | 4                              | 69                                    | 0.972                                     | 2                                | 2.8                           | 0.7                                 |
|           | 1         | 71                | 4                              | 68                                    | 0.958                                     | 3                                | 4.2                           | 1.1                                 |
|           | 2         | 71                | 4                              | 68                                    | 0.958                                     | 3                                | 4.2                           | 1.1                                 |
|           | 3         | 71                | 4                              | 67                                    | 0.944                                     | 4                                | 5.6                           | 1.4                                 |
|           | 6         | 71                | 4                              | 66                                    | 0.929                                     | 5                                | 7.0                           | 1.8                                 |
|           | 10        | 71                | 4                              | 64                                    | 0.901                                     | 7                                | 9.9                           | 2.5                                 |
|           | 24        | 71                | 4                              | 63                                    | 0.887                                     | 8                                | 11.3                          | 2.8                                 |
|           | 48        | 71                | 4                              | 63                                    | 0.887                                     | 8                                | 11.3                          | 2.8                                 |
| SS065     | 0.5       | 71                | 4                              | 70                                    | 0.986                                     | 1                                | 1.4                           | 0.4                                 |
|           | 1         | 71                | 4                              | 68                                    | 0.958                                     | 3                                | 4.2                           | 1.1                                 |
|           | 2         | 71                | 4                              | 51                                    | 0.718                                     | 20                               | 26.8                          | 6.7                                 |
|           | 3         | 71                | 4                              | 49                                    | 0.690                                     | 22                               | 28.2                          | 7.1                                 |
|           | 6         | 71                | 4                              | 48                                    | 0.676                                     | 23                               | 31.0                          | 7.8                                 |
|           | 10        | 71                | 4                              | 47                                    | 0.662                                     | 24                               | 32.4                          | 8.1                                 |
|           | 24        | 71                | 4                              | 47                                    | 0.662                                     | 24                               | 32.4                          | 8.1                                 |
|           | 48        | 71                | 4                              | 47                                    | 0.662                                     | 24                               | 32.4                          | 8.1                                 |
| SS069     | 0.5       | 71                | 4                              | 70                                    | 0.986                                     | 1                                | 1.4                           | 0.4                                 |
|           | 1         | 71                | 4                              | 69                                    | 0.972                                     | 2                                | 2.8                           | 0.7                                 |
|           | 2         | 71                | 4                              | 67                                    | 0.944                                     | 4                                | 5.6                           | 1.4                                 |
|           | 3         | 71                | 4                              | 67                                    | 0.944                                     | 4                                | 5.6                           | 1.4                                 |
|           | 6         | 71                | 4                              | 66                                    | 0.929                                     | 5                                | 7.0                           | 1.8                                 |
|           | 10        | 71                | 4                              | 54                                    | 0.761                                     | 17                               | 23.9                          | 6.0                                 |
|           | 24        | 71                | 4                              | 41                                    | 0.577                                     | 30                               | 42.3                          | 10.6                                |
|           | 48        | 71                | 4                              | 40                                    | 0.564                                     | 31                               | 43.7                          | 10.9                                |
| SS073     | 0.5       | 71                | 4                              | 70                                    | 0.986                                     | 1                                | 1.4                           | 0.4                                 |
|           | 1         | 71                | 4                              | 69                                    | 0.972                                     | 2                                | 2.8                           | 0.7                                 |
|           | 2         | 71                | 4                              | 69                                    | 0.972                                     | 2                                | 2.8                           | 0.7                                 |
|           | 3         | 71                | 4                              | 69                                    | 0.972                                     | 2                                | 2.8                           | 0.7                                 |
|           | 6         | 71                | 4                              | 69                                    | 0.972                                     | 2                                | 2.8                           | 0.7                                 |
|           | 10        | 71                | 4                              | 66                                    | 0.929                                     | 5                                | 7.0                           | 3.5                                 |
|           | 24        | 71                | 4                              | 66                                    | 0.929                                     | 5                                | 7.0                           | 3.5                                 |
|           | 48        | 71                | 4                              | 66                                    | 0.929                                     | 5                                | 7.0                           | 3.5                                 |

**Table S2.** Releasing data of Mitomycin C in PBS buffer (pH = 7.2) at 25<sup>0</sup>C

| Materials | MMC loaded ( $\mu\text{g}$ MMC/mg of materials) | Time (hr) | MMC Conc. released in solution ( $\mu\text{g}/\text{mL}$ ) | MMC released ( $\mu\text{g}$ MMC/mg of materials) | % MMC released /mg of materials | Fraction of MMC released in the solution |
|-----------|-------------------------------------------------|-----------|------------------------------------------------------------|---------------------------------------------------|---------------------------------|------------------------------------------|
| SS068     | 2.8                                             | 0.5       | 0.63                                                       | 0.16                                              | 5.7                             | 0.057                                    |
|           |                                                 | 1         | 1.7                                                        | 0.43                                              | 15.4                            | 0.154                                    |
|           |                                                 | 2         | 1.7                                                        | 0.43                                              | 15.4                            | 0.154                                    |
|           |                                                 | 3         | 1.7                                                        | 0.43                                              | 15.4                            | 0.154                                    |
|           |                                                 | 6         | 1.7                                                        | 0.43                                              | 15.4                            | 0.154                                    |
|           |                                                 | 10        | 1.7                                                        | 0.43                                              | 15.4                            | 0.154                                    |
|           |                                                 | 24        | 1.7                                                        | 0.43                                              | 15.4                            | 0.154                                    |
|           |                                                 | 48        | 1.7                                                        | 0.43                                              | 15.4                            | 0.154                                    |
| SS065     | 8.1                                             | 0.5       | 2.2                                                        | 0.55                                              | 6.8                             | 0.068                                    |
|           |                                                 | 1         | 3.2                                                        | 0.80                                              | 9.9                             | 0.099                                    |
|           |                                                 | 2         | 5.2                                                        | 1.30                                              | 16.0                            | 0.160                                    |
|           |                                                 | 3         | 8.5                                                        | 2.10                                              | 25.9                            | 0.259                                    |
|           |                                                 | 6         | 14.6                                                       | 3.70                                              | 45.7                            | 0.457                                    |
|           |                                                 | 10        | 21                                                         | 5.30                                              | 65.4                            | 0.654                                    |
|           |                                                 | 24        | 23.3                                                       | 5.80                                              | 71.6                            | 0.716                                    |
|           |                                                 | 48        | 23.3                                                       | 5.80                                              | 71.6                            | 0.716                                    |
| SS069     | 10.9                                            | 0.5       | 2.1                                                        | 0.53                                              | 4.9                             | 0.049                                    |
|           |                                                 | 1         | 2.5                                                        | 0.63                                              | 5.8                             | 0.058                                    |
|           |                                                 | 2         | 3.7                                                        | 0.93                                              | 8.5                             | 0.085                                    |
|           |                                                 | 3         | 5.8                                                        | 1.45                                              | 13.3                            | 0.133                                    |
|           |                                                 | 6         | 8.7                                                        | 2.18                                              | 20.0                            | 0.200                                    |
|           |                                                 | 10        | 11.2                                                       | 2.80                                              | 25.7                            | 0.257                                    |
|           |                                                 | 24        | 13.4                                                       | 3.35                                              | 30.7                            | 0.307                                    |
|           |                                                 | 48        | 14.7                                                       | 3.68                                              | 33.8                            | 0.338                                    |
| SS073     | 3.5                                             | 0.5       | 1.2                                                        | 0.30                                              | 8.6                             | 0.086                                    |
|           |                                                 | 1         | 2.2                                                        | 0.55                                              | 15.7                            | 0.157                                    |
|           |                                                 | 2         | 2.7                                                        | 0.68                                              | 19.4                            | 0.194                                    |
|           |                                                 | 3         | 2.8                                                        | 0.70                                              | 20.0                            | 0.200                                    |
|           |                                                 | 6         | 2.8                                                        | 0.70                                              | 20.0                            | 0.200                                    |
|           |                                                 | 10        | 2.8                                                        | 0.70                                              | 20.0                            | 0.200                                    |
|           |                                                 | 24        | 2.8                                                        | 0.70                                              | 20.0                            | 0.200                                    |
|           |                                                 | 48        | 2.8                                                        | 0.70                                              | 20.0                            | 0.200                                    |
